# Supplementary material for: The pure shape effect with a removing facet effect of single-crystalline anatase TiO2 (101) for photocatalytic application
Source: Royal Society of Chemistry journal article supplement (doi:10.1039/c3nr02273k), 2013-01-01
Supplement: c3nr02273k.pdf [file c3nr02273k.pdf]

## Pure Shape Effect with Removing Facet Effect of Single-Crystalline Anatase TiO<sub>2</sub> (101) for Photocatalytic Application

Liqun Ye,<sup>a,b</sup> Jinyan Liu,<sup>a</sup> Zhuo Jiang,<sup>a</sup> Tianyou Peng<sup>a</sup> and Ling Zan<sup>a,\*</sup>

<sup>a</sup> College of Chemistry and Molecular Science, Wuhan University, China. Fax: 86 27 8737 8727; Tel: 86 27 6875 2919; E-mail: [irlab@whu.edu.cn](mailto:irlab@whu.edu.cn)

<sup>b</sup> College of Chemistry and Pharmaceutical Engineering, Nanyang Normal University, Nanyang 473061, People's Republic of China

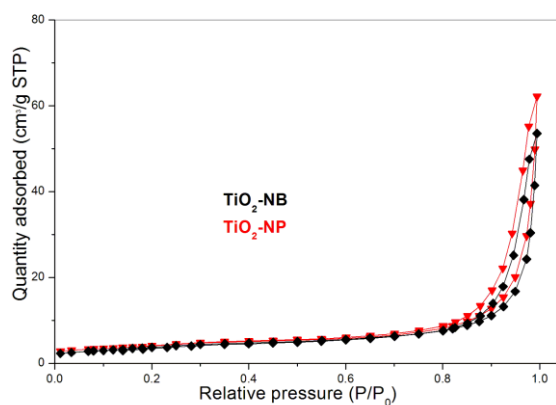

Figure S1 Nitrogen adsorption-desorption isotherm of TiO<sub>2</sub>-NB and TiO<sub>2</sub>-NP.

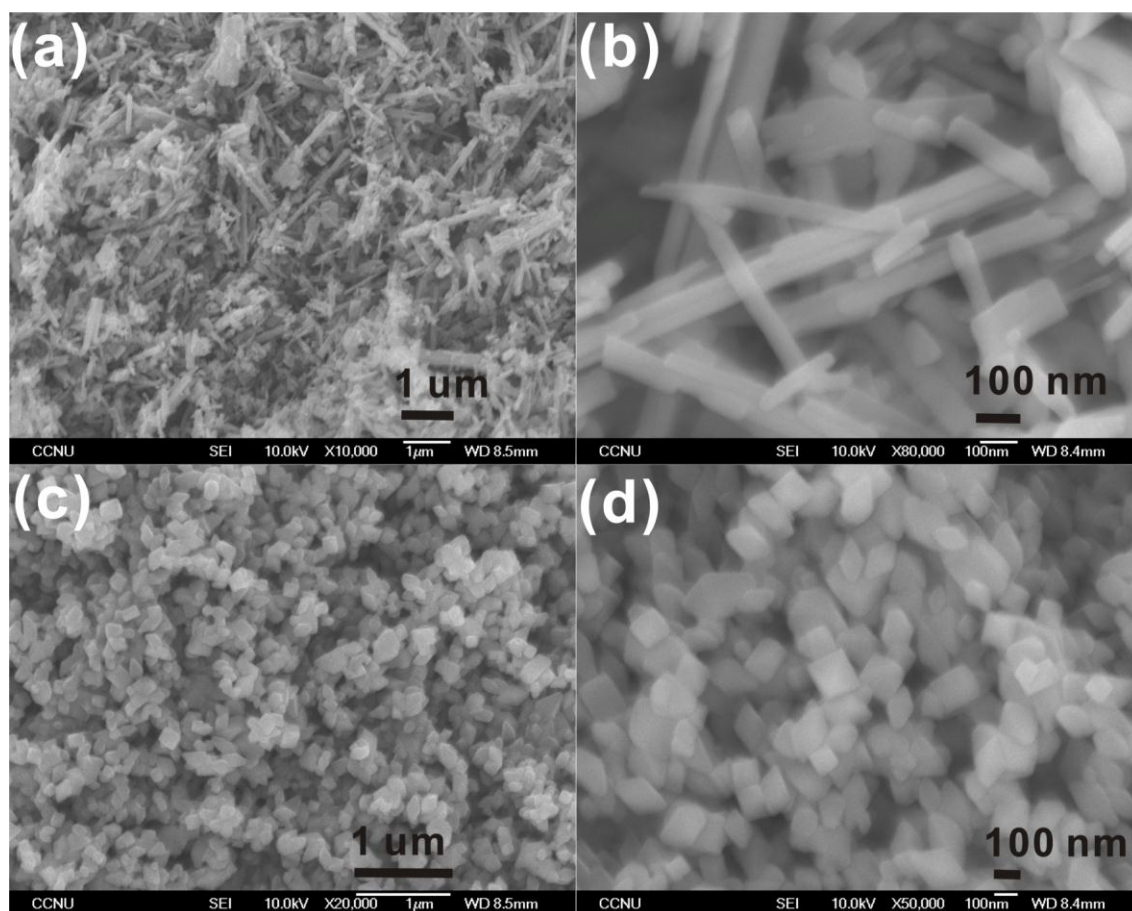

Figure S2 FESEM images of TiO<sub>2</sub>-NB (a and b) and TiO<sub>2</sub>-NP (c and d).

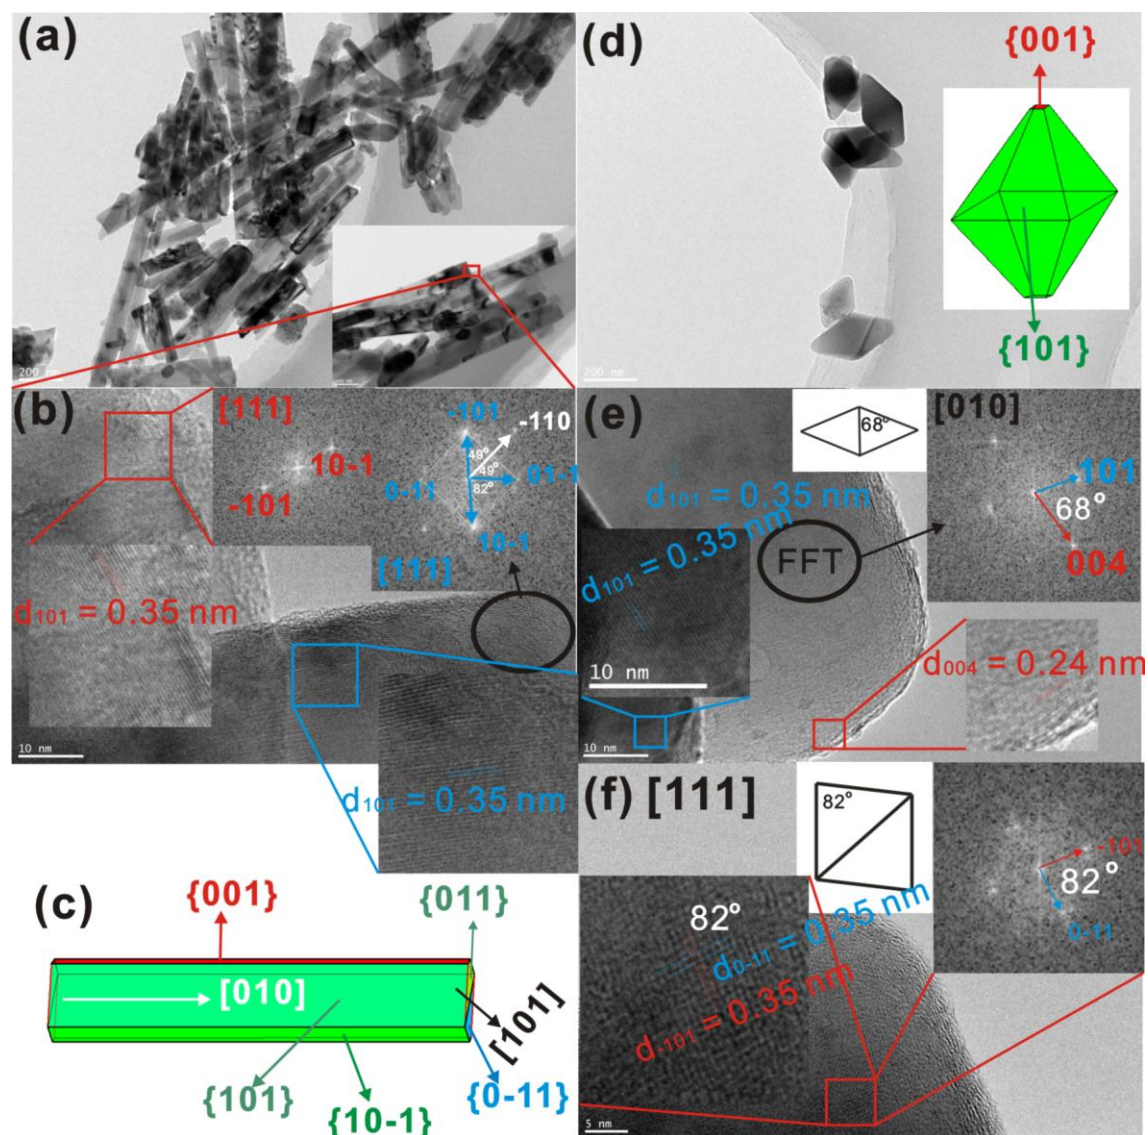

**Figure S3** (a) TEM image of TiO<sub>2</sub> NB; (b) HRTEM image and the corresponding FFT pattern of TiO<sub>2</sub>-NB; (c) model of TiO<sub>2</sub>-NB; (d) TEM image of TiO<sub>2</sub>-NP; and (d) HRTEM image and the corresponding FFT pattern of TiO<sub>2</sub>-NP with  $[010]$  orientation; and (f) HRTEM image and the corresponding FFT pattern of TiO<sub>2</sub>-NP with  $[111]$  orientation.

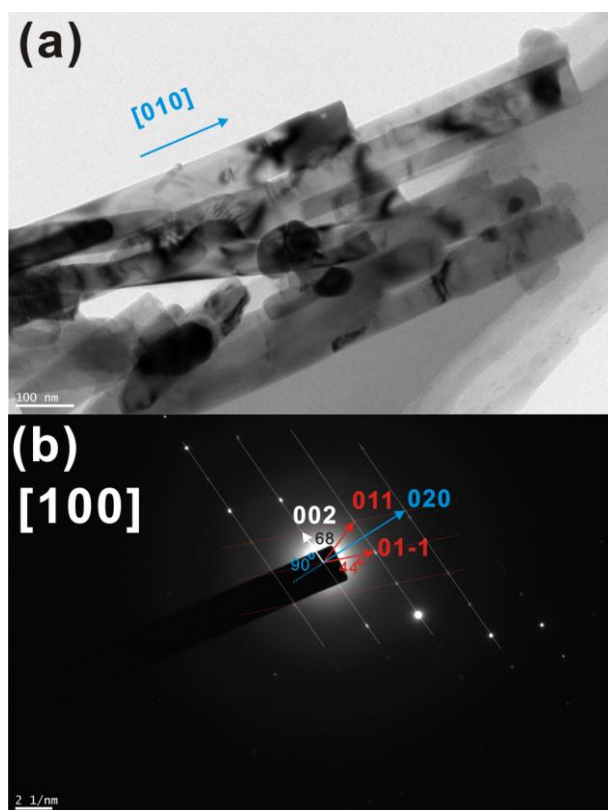

**Figure S4** TEM image (a) and SAED pattern (b) of TiO<sub>2</sub>-NB.

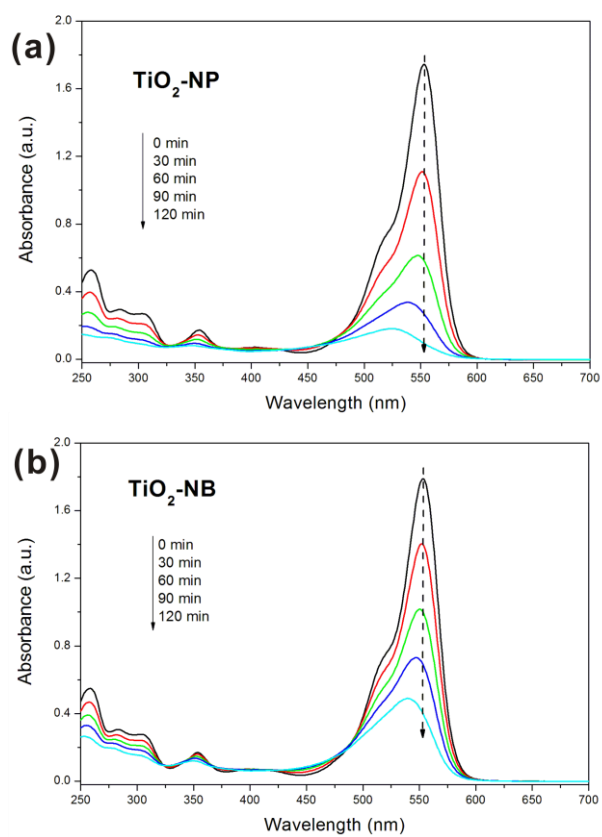

**Figure S5** UV-Vis absorption spectra of RhB under photocatalytic process.

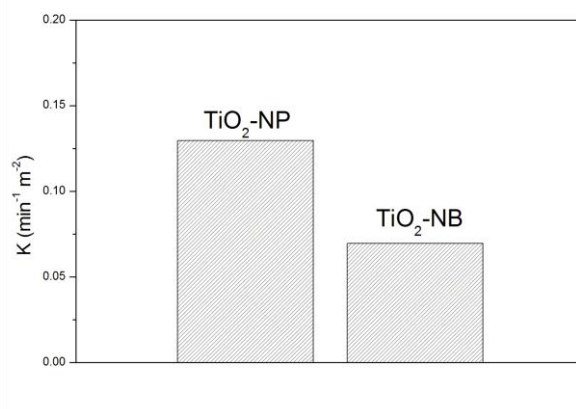

**Figure S6** Photocatalytic activity for RhB degradation normalization by the surface area.

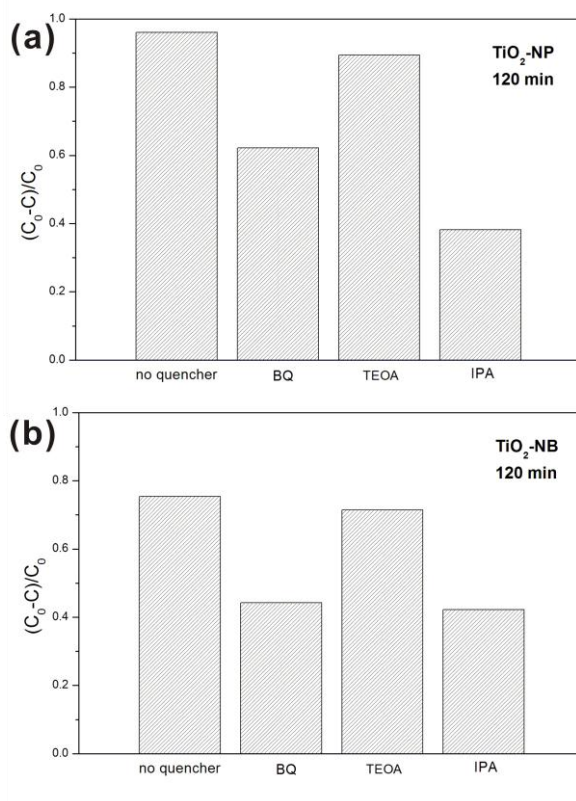

**Figure S7** Trapping experiment of active species during the photocatalytic reaction with 120 min visible light irradiation.

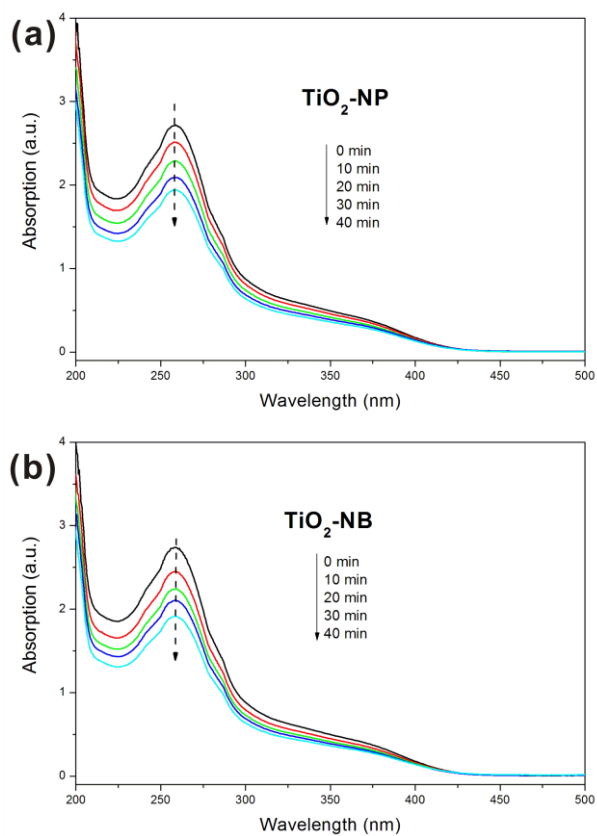

Figure S8 UV-Vis absorption spectra of NBT in  $\text{TiO}_2$  suspension.

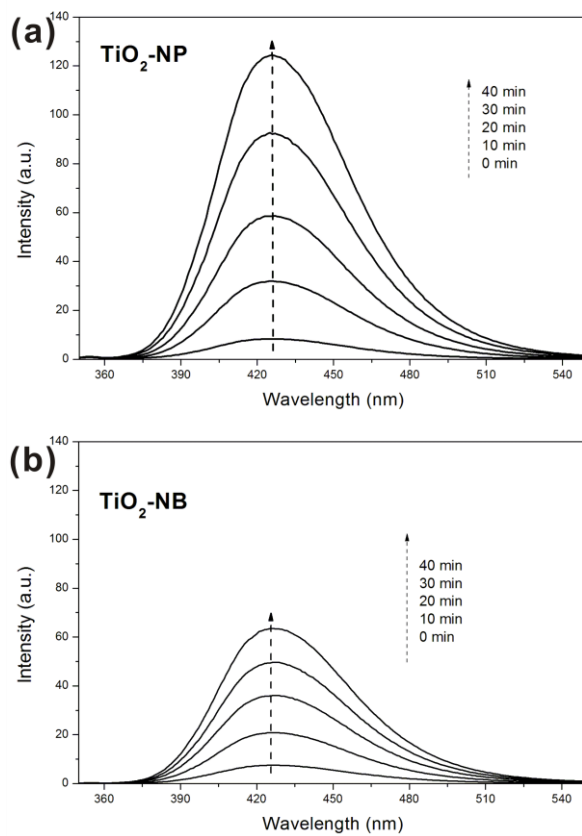

Figure S9 PL spectra of TAOH in  $\text{TiO}_2$  suspension.
